# Supplementary material for: Willingness of Housing First Participants to Consider Supported-Employment Services
Source: Atypon-hosted journal article supplement (doi:10.1176/appi.ps.201500140), 2016-01-04
Supplement: appi.ps.201500140.ds001.pdf [file appi.ps.201500140.ds001.pdf]

Online supplement Table 1 Inclusion criteria by study

|                                                                                                                                                                                                                                                                                                                                                                                                                                                              |                                                                                          |
|--------------------------------------------------------------------------------------------------------------------------------------------------------------------------------------------------------------------------------------------------------------------------------------------------------------------------------------------------------------------------------------------------------------------------------------------------------------|------------------------------------------------------------------------------------------|
| Housing First, parent study                                                                                                                                                                                                                                                                                                                                                                                                                                  | Individual Placement and Support, sub-study                                              |
| 18 years or older<br>The presence of mental illness: psychotic disorder, major depressive disorder, mood disorder with psychotic features, mania or hypomania, post-traumatic stress disorder, panic disorder<br>Experience of absolute homelessness (living on the street without shelter or making use of emergency shelters) or being precariously housed with at least two instances of absolute homelessness in the past year<br>Legal status in Canada | Inclusion in the Housing First experimental group<br>Receiving Intensive Case Management |

Online supplement Table 2 Statistical methods

| Data                                                                               | Statistical method                                                                                  |
|------------------------------------------------------------------------------------|-----------------------------------------------------------------------------------------------------|
| Categorical data, observations in $\chi^2$ matrix >5                               | Pearson $\chi^2$ statistics                                                                         |
| Categorical data, observations in $\chi^2$ matrix <5                               | Fisher's exact test                                                                                 |
| Continuous data, normally distributed according to Shapiro-Wilk test for normality | Mean and Standard Deviation (SD) reported, student's <i>t</i> tests, two tailed, $\alpha$ level .01 |
| Continuous data, skewed distribution according to Shapiro-Wilk test for normality  | Median and Interquartile Range (IQR) reported, Somers' D non-parametric test, $\alpha$ level .01    |

Online supplement Table 3 definitions of housing status

| Designation           | Definition                                                                                                             |
|-----------------------|------------------------------------------------------------------------------------------------------------------------|
| Stable housing        | A private residence supplied by the Housing First program, or private housing obtained by the participant on their own |
| Institutional setting | Setting where participant activities may be restricted, as in hospitals or prisons                                     |
| Unstable housing      | Emergency shelters, sleeping on the street, or staying temporarily with family or friends                              |
| Mixed category        | Regroups participants who have                                                                                         |

|  |                                                                  |
|--|------------------------------------------------------------------|
|  | spent less than 2/3 of the month in any of the previous settings |
|--|------------------------------------------------------------------|

Online supplement Table 4 Response to offer of randomization subdivided by their desire for paid work in the community (n=194)

|                          | Accepted randomization |     | Declined randomization |     | Not offered, or Institutionalized |     | Total |     |
|--------------------------|------------------------|-----|------------------------|-----|-----------------------------------|-----|-------|-----|
|                          | n                      | %   | n                      | %   | n                                 | %   | n     | %   |
| <b>Wanted work</b>       | 75                     | 85  | 58                     | 63  | 0                                 | 0   | 133   | 69  |
| <b>Did not want work</b> | 4                      | 5   | 32                     | 35  | 0                                 | 0   | 36    | 19  |
| <b>Undecided</b>         | 6                      | 7   | 0                      | 0   | 4                                 | 29  | 10    | 5   |
| <b>Missing response</b>  | 3                      | 3   | 2                      | 2   | 10                                | 71  | 15    | 8   |
| <b>Total</b>             | 88                     | 100 | 92                     | 100 | 14                                | 100 | 194   | 100 |

Online supplement Table 5 Differences between those that accepted randomization and those that declined, independent of the desire for work.

|                                                                         | Accepted n=88 |       | Declined n=92 |       | Test Statistic | df  | Significance       |
|-------------------------------------------------------------------------|---------------|-------|---------------|-------|----------------|-----|--------------------|
|                                                                         | n or mean     | %     | n or mean     | %     |                |     |                    |
| <b>Age</b>                                                              | 47.2±10.0     |       | 51.1±9.6      |       | t=-2.57        | 178 | .011               |
| <b>Male</b>                                                             | 54            | 61    | 49            | 53    | $\chi^2=4.04$  | 1   | .171               |
| <b>Education (years)</b>                                                | 11.9±3.3      |       | 10.4±2.8      |       | z=-3.17        | 178 | .002 <sup>a</sup>  |
| <b>Worked at least one year</b>                                         | 75            | 85    | 79            | 86    | $\chi^2=3.71$  | 1   | .358               |
| <b>Comorbid conditions</b>                                              | 4.9±3.1       |       | 5.3±3.1       |       | t=7.22         | 178 | .220               |
| <b>Number of days, out of 90, spent prior to study in: (Median IQR)</b> |               |       |               |       |                |     |                    |
| <b>Stable housing</b>                                                   | 60            | 47-90 | 73            | 54-90 | z=3.76         | 178 | <.001 <sup>a</sup> |
| <b>Emergency shelters</b>                                               | 14            | 0-43  | 3             | 0-10  | z=-5.07        | 178 | <.001 <sup>a</sup> |
| <b>Percent of adult life homeless</b>                                   |               |       |               |       | $\chi^2=9.75$  | 5   | .083               |
| <b>&lt;1%</b>                                                           | 21            | 24    | 8             | 9     |                |     |                    |
| <b>1-3%</b>                                                             | 16            | 18    | 20            | 22    |                |     |                    |
| <b>3-8%</b>                                                             | 18            | 20    | 25            | 27    |                |     |                    |
| <b>8-20%</b>                                                            | 14            | 16    | 22            | 24    |                |     |                    |
| <b>20-40%</b>                                                           | 9             | 10    | 6             | 7     |                |     |                    |
| <b>40%&lt;</b>                                                          | 10            | 11    | 11            | 12    |                |     |                    |
| <b>Diagnosis</b>                                                        |               |       |               |       | $\chi^2=11.73$ | 6   | .896               |

|                                                                                                                               |                |    |                |    |                |                      |
|-------------------------------------------------------------------------------------------------------------------------------|----------------|----|----------------|----|----------------|----------------------|
| <b>MDD</b>                                                                                                                    | 58             | 66 | 59             | 64 |                |                      |
| <b>Mania</b>                                                                                                                  | 4              | 5  | 1              | 1  |                |                      |
| <b>PTSD</b>                                                                                                                   | 3              | 3  | 3              | 3  |                |                      |
| <b>Panic disorder</b>                                                                                                         | 5              | 6  | 3              | 3  |                |                      |
| <b>Psychotic disorder</b>                                                                                                     | 18             | 20 | 26             | 28 |                |                      |
| <b>Employment status</b>                                                                                                      |                |    |                |    | $\chi^2=5.02$  | 6 .523               |
| <b>Unemployed</b>                                                                                                             | 82             | 93 | 81             | 88 |                |                      |
| <b>Casual work</b>                                                                                                            | 4              | 5  | 3              | 3  |                |                      |
| <b>Retired</b>                                                                                                                | 0              | 0  | 3              | 3  |                |                      |
| <b>Student</b>                                                                                                                | 1              | 1  | 1              | 1  |                |                      |
| <b>Other</b>                                                                                                                  | 1              | 1  | 4              | 4  |                |                      |
| <b>Reason for not working</b>                                                                                                 |                |    |                |    | $\chi^2=9.85$  | 6 .097 <sup>b</sup>  |
| <b>Mental illness</b>                                                                                                         | 37             | 42 | 45             | 49 |                |                      |
| <b>Physical illness</b>                                                                                                       | 7              | 8  | 10             | 11 |                |                      |
| <b>Both</b>                                                                                                                   | 14             | 16 | 15             | 16 |                |                      |
| <b>Fear of loss of benefits</b>                                                                                               | 0              | 0  | 1              | 1  |                |                      |
| <b>Other</b>                                                                                                                  | 30             | 34 | 21             | 23 |                |                      |
| <b>Arrests in past 6 months</b>                                                                                               |                |    |                |    | $\chi^2=11.03$ | 3 0.006 <sup>b</sup> |
| <b>No arrests</b>                                                                                                             | 69             | 78 | 86             | 93 |                |                      |
| <b>1</b>                                                                                                                      | 13             | 15 | 3              | 3  |                |                      |
| <b>2-3</b>                                                                                                                    | 6              | 7  | 2              | 2  |                |                      |
| <b>4&lt;</b>                                                                                                                  | 0              | 0  | 1              | 1  |                |                      |
| <b>Cultural identity</b>                                                                                                      |                |    |                |    |                | Not tested           |
| <b>Aboriginal</b>                                                                                                             | 0              | 0  | 3              | 3  |                |                      |
| <b>Asian</b>                                                                                                                  | 1              | 1  | 1              | 1  |                |                      |
| <b>Black African</b>                                                                                                          | 3              | 3  | 0              | 0  |                |                      |
| <b>Black Canadian</b>                                                                                                         | 1              | 1  | 0              | 0  |                |                      |
| <b>Latin American</b>                                                                                                         | 3              | 3  | 0              | 0  |                |                      |
| <b>Middle Eastern</b>                                                                                                         | 5              | 6  | 1              | 1  |                |                      |
| <b>White Canadian</b>                                                                                                         | 64             | 73 | 77             | 84 |                |                      |
| <b>White European</b>                                                                                                         | 3              | 3  | 1              | 1  |                |                      |
| <b>Mixed</b>                                                                                                                  | 5              | 6  | 1              | 1  |                |                      |
| <b>Other</b>                                                                                                                  | 3              | 3  | 8              | 9  |                |                      |
| <b>Community integration scale score (higher scores indicate greater integration) Mean <math>\pm</math> SEM</b>               |                |    |                |    |                |                      |
| <b>Physical integration (possible 7)</b>                                                                                      | 2.1 $\pm$ .16  |    | 2.0 $\pm$ .15  |    | t=2.57         | 178 .480             |
| <b>Psychological integration (possible 20)</b>                                                                                | 10.0 $\pm$ .38 |    | 10.3 $\pm$ .39 |    | t=-.35         | 178 .706             |
| <b>Recovery assessment scale score (higher scores indicate greater endorsement of recovery items) Mean<math>\pm</math>SEM</b> |                |    |                |    |                |                      |
| <b>Personal confidence and hope (possible 35)</b>                                                                             | 24.1 $\pm$ .58 |    | 23.3 $\pm$ .61 |    | t=.89          | 178 .376             |
| <b>Willingness to ask for help (possible 15)</b>                                                                              | 11.2 $\pm$ .25 |    | 11.2 $\pm$ .32 |    | t=-1.07        | 178 .915             |
| <b>Goal and success oriented (possible 25)</b>                                                                                | 21.1 $\pm$ .33 |    | 19.5 $\pm$ .46 |    | t=-2.25        | 178 .024             |
| <b>Reliance on</b>                                                                                                            | 13.9 $\pm$ .34 |    | 13.5 $\pm$ .40 |    | t=1.51         | 178 .727             |

|                                                |         |         |        |     |      |
|------------------------------------------------|---------|---------|--------|-----|------|
| <b>others (possible 20)</b>                    |         |         |        |     |      |
| <b>Not dominated by symptoms (possible 15)</b> | 9.1±.29 | 8.3±.32 | t=1.80 | 178 | .074 |

<sup>a</sup> Somer's D, <sup>b</sup>Fisher's exact  $\chi^2$  test, IQR Interquartile Range; SEM, Standard Error of the Mean

Online supplement Table 6 Odds of obtaining employment for those who wanted work, by choice to accept or decline randomization (n= 133).

|                                                       | <b>Odds Ratio</b> | <b>p&gt;z</b> | <b>95% Confidence Interval</b> |
|-------------------------------------------------------|-------------------|---------------|--------------------------------|
| <b>Declined randomization</b>                         | .42               | .022          | .20-.88                        |
| <b>Types of residence, compared to Stable housing</b> |                   |               |                                |
| <b>Mixed</b>                                          | .44               | .151          | .14-1.35                       |
| <b>Unstable</b>                                       | .43               | .034          | .20-.94                        |
| <b>Psychotic illness</b>                              | .88               | .782          | .37-2.13                       |
| <b>Education (12y+)</b>                               | 1.78              | .064          | .97-3.27                       |
| <b>Age</b>                                            | .99               | .511          | .96-1.02                       |
